# Supplementary material
Source: ML conference proceedings conference paper supplement (https://openaccess.thecvf.com/content/CVPR2023/html/Chao_Equivalent_Transformation_and_CVPR_2023_paper.html)
Supplement: Supplementary file 1 [file Chao_Equivalent_Transformation_and_CVPR_2023_supplemental.pdf]

## A. Operation Descriptions

### A.1. Definitions

A convolution operation is formulated as

$$z = W \otimes x + b, \quad (1)$$

where  $x \in \mathbb{R}^{c_i \times h \times w}$  and  $z \in \mathbb{R}^{c_o \times h \times w}$  are the input and output tensors, respectively,  $W \in \mathbb{R}^{c_o \times k \times k \times c_i}$  and  $b \in \mathbb{R}^{c_o}$  are the kernel and the bias of the convolution, and  $k$  is the kernel size, which is an odd number,  $c_i, c_o$  are the numbers of the input and output channels, and  $h, w$  are the input height and width. The element of  $z$  at  $(p, s, t)$  is:

$$z(p, s, t) = b(p) + \sum_{\ell=0}^{c_i-1} \sum_{\eta=-m}^m \sum_{\tau=-m}^m W(p, \eta, \tau, \ell) \times x(\ell, s + \eta, t + \tau). \quad (2)$$

where  $m = \lfloor k/2 \rfloor$ . For convenience, except for the middle two dimensions of the convolution kernel, all indices start from 0. The index range of the two dimensions in the middle of the convolution kernel is  $[-m, m]$ . If either  $s + \eta$  or  $t + \tau$  is out of index range,  $x(\ell, s + \eta, t + \tau)$  is 0.

$I$  is the identity kernel of the convolution operation with:

$$I(p, s, t, q) = \begin{cases} 1, & p = q \text{ and } s = t = 0, \\ 0, & \text{otherwise.} \end{cases} \quad (3)$$

We define the concatenation of the feature vectors in the channel dimension as  $z = \begin{bmatrix} x \\ y \end{bmatrix}$ , where  $x \in \mathbb{R}^{c_1 \times h \times w}$ ,  $y \in \mathbb{R}^{c_2 \times h \times w}$ , and  $z \in \mathbb{R}^{(c_1+c_2) \times h \times w}$ . The element of  $z$  at  $(p, s, t)$  is:

$$z(p, s, t) = \begin{cases} x(p, s, t), & p < c_1, \\ y(p - c_1, s, t), & \text{otherwise.} \end{cases} \quad (4)$$

The concatenation of the convolution kernels in the horizontal direction (*i.e.*, input-dimension concatenation) is defined as  $W = [W_{h,1}, W_{h,2}]$ , where  $W_{h,1} \in \mathbb{R}^{c_o \times k \times k \times c_{i1}}$ ,  $W_{h,2} \in \mathbb{R}^{c_o \times k \times k \times c_{i2}}$  and  $W \in \mathbb{R}^{c_o \times k \times k \times (c_{i1}+c_{i2})}$ . The element of  $W$  at  $(p, s, t, q)$  is:

$$W(p, s, t, q) = \begin{cases} W_{h,1}(p, s, t, q), & q < c_{i1}, \\ W_{h,2}(p, s, t, q - c_{i1}), & \text{otherwise.} \end{cases} \quad (5)$$

Likewise, the concatenation of the convolution kernels in the vertical direction (*i.e.*, output-dimension concatenation) is defined as  $W = \begin{bmatrix} W_{v,1} \\ W_{v,2} \end{bmatrix}$ , where  $W_{v,1} \in \mathbb{R}^{c_{o1} \times k \times k \times c_i}$ ,  $W_{v,2} \in \mathbb{R}^{c_{o2} \times k \times k \times c_i}$  and  $W \in \mathbb{R}^{(c_{o1}+c_{o2}) \times k \times k \times c_i}$ . The element of  $W$  at  $(p, t, s, q)$  is:

$$W(p, t, s, q) = \begin{cases} W_{v,1}(p, t, s, q), & p < c_{o1}, \\ W_{v,2}(p - c_{o1}, t, s, q), & \text{otherwise.} \end{cases} \quad (6)$$

The multiplication of the convolution kernels is defined as:  $W_3 = W_1 \times W_2$ , where  $W_1 \in \mathbb{R}^{c_1 \times k_1 \times k_2 \times c_2}$ ,  $W_2 \in \mathbb{R}^{c_2 \times k_3 \times k_4 \times c_3}$ ,  $W_3 \in \mathbb{R}^{c_1 \times (k_1+k_3-1) \times (k_2+k_4-1) \times c_3}$ , and  $k_1, k_2, k_3$  and  $k_4$  are all odd numbers. The element of  $W_3$  at  $(p, s, t, q)$  is:

$$W_3(p, s, t, q) = \sum_{\ell=0}^{c_2-1} \sum_{\eta=-m_1}^{m_1} \sum_{\tau=-m_2}^{m_2} W_1(p, \eta, \tau, \ell) \times W_2(\ell, s - \eta, t - \tau, q), \quad (7)$$

where  $m_i = \lfloor \frac{k_i}{2} \rfloor$  for  $i = 1, 2$ . The multiplication of the convolution kernel and bias is defined as  $b_2 = W \times b_1$ , where  $W \in \mathbb{R}^{c_o \times k_1 \times k_2 \times c_i}$ ,  $b_1 \in \mathbb{R}^{c_i}$  and  $b_2 \in \mathbb{R}^{c_o}$ . The element of  $b_2$  at  $(p)$  is:

$$b_2(p) = \sum_{\ell=0}^{c_i-1} \sum_{\eta=-m_1}^{m_1} \sum_{\tau=-m_2}^{m_2} W(p, \eta, \tau, \ell) \times b_1(\ell). \quad (8)$$

The convolution kernel multiplication satisfies:

$$W_1 \otimes (W_2 \otimes x + b_2) + b_1 = (W_1 \times W_2) \otimes x + ((W_1 \times b_2) + b_1), \quad (9)$$

which can be proved with the help of Eq. (2). The transformation process of the reparameterization technique can be described by Eq. (9), and the corresponding codes are provided in the supplementary material.

Moreover, the block multiplication of the convolution kernels has the same properties as the block multiplication of the matrices.

## A.2. Kernel Properties

For the kernel properties in the Method section, we have the following properties:

- **Property 1** For any  $x \in \mathbb{R}^{c \times h \times w}$  and  $I \in \mathbb{R}^{c \times k \times w \times c}$ , we have  $I \otimes x = x$ ,
- **Property 2** For any  $W_1 \in \mathbb{R}^{c_o \times k \times k \times c_{i1}}$ ,  $W_2 \in \mathbb{R}^{c_o \times k \times k \times c_{i2}}$ ,  $x \in \mathbb{R}^{c_{i1} \times h \times w}$  and  $y \in \mathbb{R}^{c_{i2} \times h \times w}$ , we have
$$[W_1, W_2] \otimes \begin{bmatrix} x \\ y \end{bmatrix} = W_1 \otimes x + W_2 \otimes y,$$
- **Property 3** For any  $W_1 \in \mathbb{R}^{c_{o1} \times k \times k \times c_i}$ ,  $W_2 \in \mathbb{R}^{c_{o2} \times k \times k \times c_i}$ ,  $x \in \mathbb{R}^{c_i \times h \times w}$ , we have  $\begin{bmatrix} W_1 \\ W_2 \end{bmatrix} \otimes x = \begin{bmatrix} W_1 \otimes x \\ W_2 \otimes x \end{bmatrix}$ ,
- **Property 4** For any  $W \in \mathbb{R}^{c_o \times k \times k \times c_i}$ , we have  $I \times W = W$ .

In the following, we give proofs of the correctness of these four properties.

**Correctness of Property 1.** Let  $z = I \otimes x$ ,  $m = \lfloor k/2 \rfloor$ , then the element of  $z$  at  $(p, s, t)$  is

$$\begin{aligned} z(p, s, t) &= \sum_{\ell=0}^{c-1} \sum_{\eta=-m}^m \sum_{\tau=-m}^m I(p, \eta, \tau, \ell) \times x(\ell, s + \eta, t + \tau) \\ &= \sum_{\ell=0}^{c-1} \sum_{k_1=-m}^m \sum_{k_2=-m}^m [\ell = p] \times [\eta = \tau = 0] \times x(\ell, s + \eta, t + \tau) \\ &= x(p, s, t) \end{aligned}$$

where  $[expr]$  is 1 when  $expr$  is true, and 0 otherwise. □

**Correctness of Property 2.** Let  $W = [W_1, W_2]$ ,  $z = \begin{bmatrix} x \\ y \end{bmatrix}$ ,  $\hat{x} = W_1 \otimes x$ ,  $\hat{y} = W_2 \otimes y$  and  $\hat{z} = W \otimes z$ , where  $W \in \mathbb{R}^{c_o \times k \times k \times (c_{i1} + c_{i2})}$ ,  $z \in \mathbb{R}^{(c_{i1} + c_{i2}) \times h \times w}$ ,  $\hat{x} \in \mathbb{R}^{c_o \times h \times w}$ ,  $\hat{y} \in \mathbb{R}^{c_o \times h \times w}$ ,  $\hat{z} \in \mathbb{R}^{c_o \times h \times w}$  and  $m = \lfloor k/2 \rfloor$ . Then the element of  $\hat{z}$  at  $(p, s, t)$  is:

$$\begin{aligned} \hat{z}(p, s, t) &= \sum_{\ell=0}^{c_{i1} + c_{i2} - 1} \sum_{\eta=-m}^m \sum_{\tau=-m}^m W(p, \eta, \tau, \ell) \times z(\ell, s + \eta, t + \tau) \\ &= \sum_{\ell_1=0}^{c_{i1} - 1} \sum_{\eta=-m}^m \sum_{\tau=-m}^m W_1(p, \eta, \tau, \ell_1) \times x(\ell_1, s + \eta, t + \tau) \\ &\quad + \sum_{\ell_2=0}^{c_{i2} - 1} \sum_{\eta=-m}^m \sum_{\tau=-m}^m W_2(p, \eta, \tau, \ell_2) \times y(\ell_2, s + \eta, t + \tau) \\ &= \hat{x}(p, s, t) + \hat{y}(p, s, t) \end{aligned}$$

**Correctness of Property 3.** Let  $W = \begin{bmatrix} W_1 \\ W_2 \end{bmatrix}$ ,  $z_1 = W_1 \otimes x$ ,  $z_2 = W_2 \otimes x$ ,  $z = \begin{bmatrix} W_1 \\ W_2 \end{bmatrix} \otimes x$ , where  $W \in \mathbb{R}^{(c_{o1} + c_{o2}) \times k \times k \times c_i}$ ,  $z_1 \in \mathbb{R}^{c_{o1} \times h \times w}$ ,  $z_2 \in \mathbb{R}^{c_{o2} \times h \times w}$ ,  $z \in \mathbb{R}^{(c_{o1} + c_{o2}) \times h \times w}$  and  $m = \lfloor k/2 \rfloor$ . □

When  $0 \leq p < c_{o1}$ , the element of  $z$  at  $(p, s, t)$  is:

$$\begin{aligned} z(p, s, t) &= \sum_{\ell=0}^{c_i-1} \sum_{\eta=-m}^m \sum_{\tau=-m}^m W(p, \eta, \tau, \ell) \times x(\ell, s + \eta, t + \tau) \\ &= \sum_{\ell=0}^{c_i-1} \sum_{\eta=-m}^m \sum_{\tau=-m}^m W_1(p, \eta, \tau, \ell) \times x(\ell, s + \eta, t + \tau) \\ &= z_1(p, s, t) \end{aligned}$$

When  $c_{o1} \leq p < c_{o1} + c_{o2}$ , the element of  $z$  at  $(p, s, t)$  is:

$$\begin{aligned} z(p, s, t) &= \sum_{\ell=0}^{c_i-1} \sum_{\eta=-m}^m \sum_{\tau=-m}^m W(p, \eta, \tau, \ell) \times x(\ell, s + \eta, t + \tau) \\ &= \sum_{\ell=0}^{c_i-1} \sum_{\eta=-m}^m \sum_{\tau=-m}^m W_2(p - c_{o1}, \eta, \tau, \ell) \times x(\ell, s + \eta, t + \tau) \\ &= z_2(p - c_{o1}, s, t) \end{aligned}$$

□

**Correctness of Property 4.** Let  $\hat{W} = I \times W$ ,  $m_i = \lfloor \frac{k_i}{2} \rfloor$  for  $i = 1, 2$ , then the element of  $\hat{W}$  at  $(p, s, t, q)$  is:

$$\begin{aligned} \hat{W}(p, s, t, q) &= \sum_{\ell=0}^{c_o-1} \sum_{\eta=-m_1}^{m_1} \sum_{\tau=-m_2}^{m_2} I(p, \eta, \tau, \ell) \times W(\ell, s - \eta, t - \tau, q) \\ &= \sum_{\ell=0}^{c_o-1} \sum_{\eta=-m_1}^{m_1} \sum_{\tau=-m_2}^{m_2} ([\eta = \tau = 0] \times [\ell = p]) \times W(\ell, s - \eta, t - \tau, q) \\ &= W(p, s, t, q) \end{aligned}$$

□

**Remark 1** The kernels in step 4 of main paper are  $[I, I]$  and  $\text{diag}(W, \text{repeat}(I, n))$ , and the biases are 0 and  $\begin{bmatrix} b \\ 0 \end{bmatrix}$  respectively. Using Eq. (9) and Property 4, the merging process is as follows:

$$\begin{aligned} & [I, I] \otimes \left( \begin{bmatrix} W & O \\ O & \text{repeat}(I, n) \end{bmatrix} \otimes x + \begin{bmatrix} b \\ 0 \end{bmatrix} \right) + 0 \\ &= \left( [I, I] \times \begin{bmatrix} W & O \\ O & \text{repeat}(I, n) \end{bmatrix} \right) \otimes x + \left( [I, I] \times \begin{bmatrix} b \\ 0 \end{bmatrix} + 0 \right) \\ &= [W, \text{repeat}(I, n)] \otimes x + b \end{aligned}$$

so the two convolutions are merged into one convolution, whose kernel is  $[W, \text{repeat}(I, n)]$  and bias is  $b$ .

## B. More Qualitative Comparison

This section provides more qualitative comparisons. Different models in the same column have similar inference latencies.

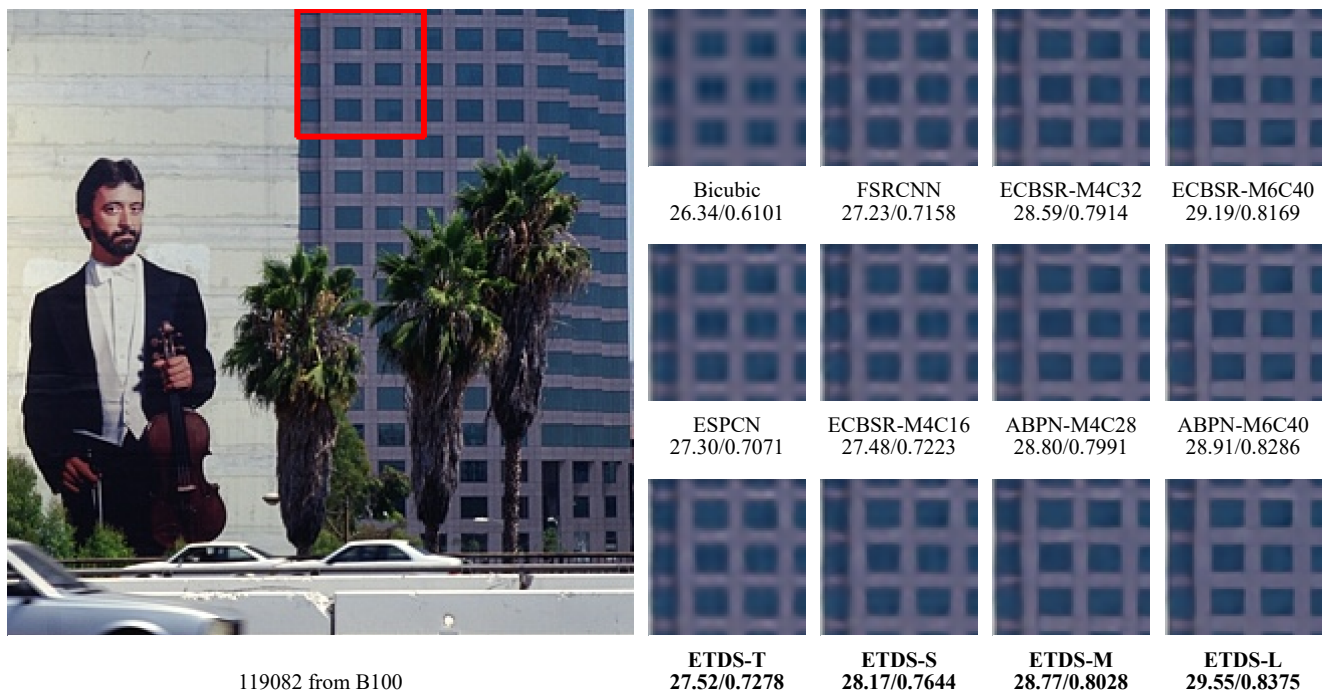

Figure 1. The window edges of images generated by ETDS-L are sharper. Zooming for details.

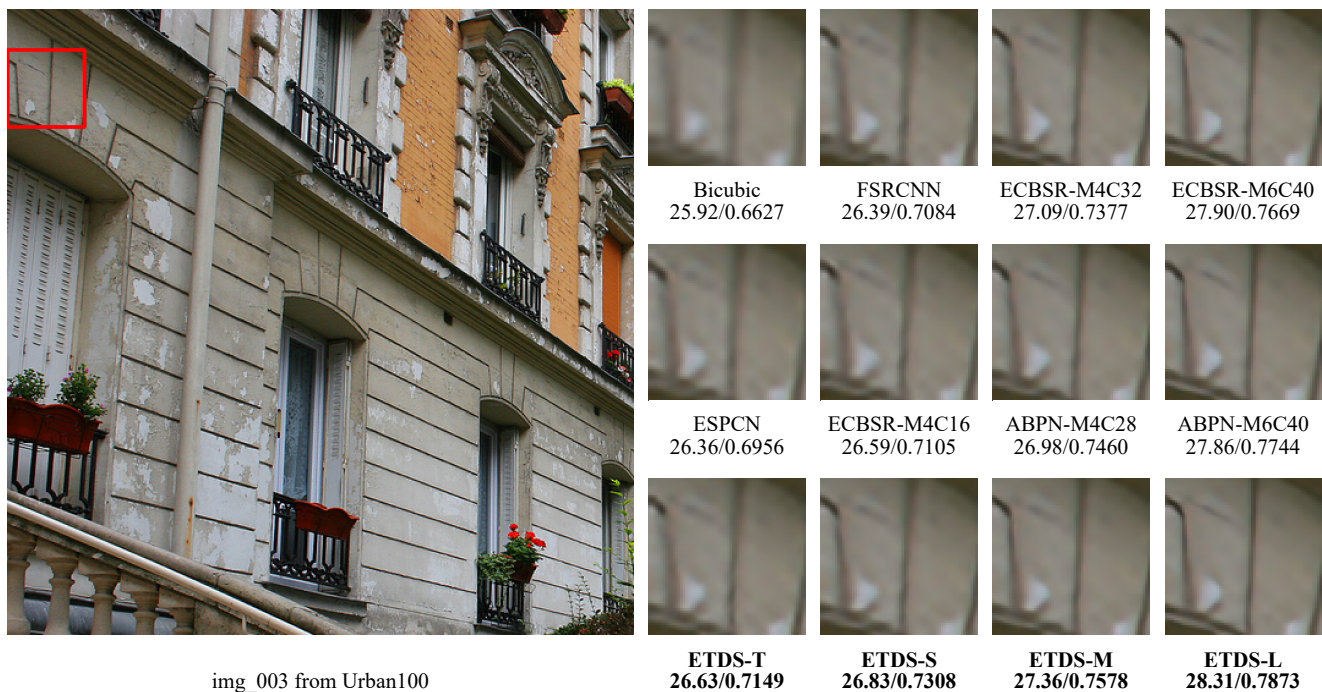

Figure 2. In the images generated by ETDS-L, the stripes on the wall are much clearer. Zooming for details.

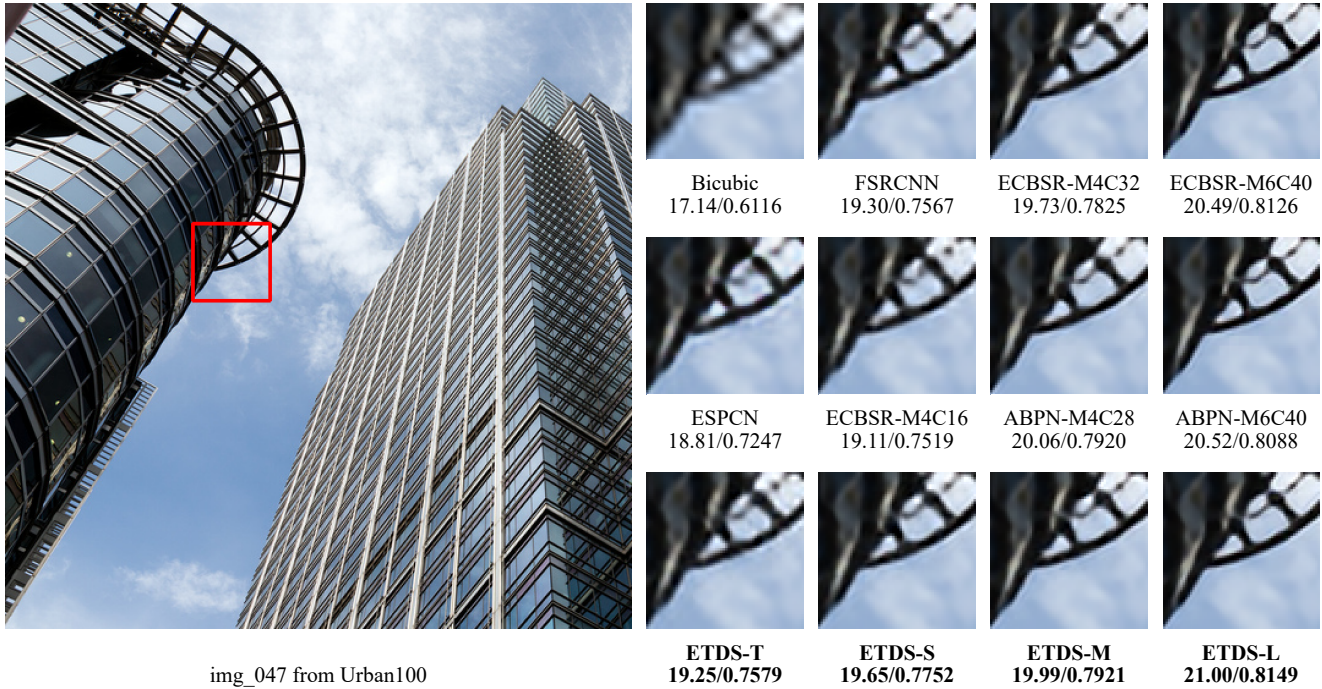

Figure 3. The images generated by ETDS-L have the fewest artifacts. Zooming for details.

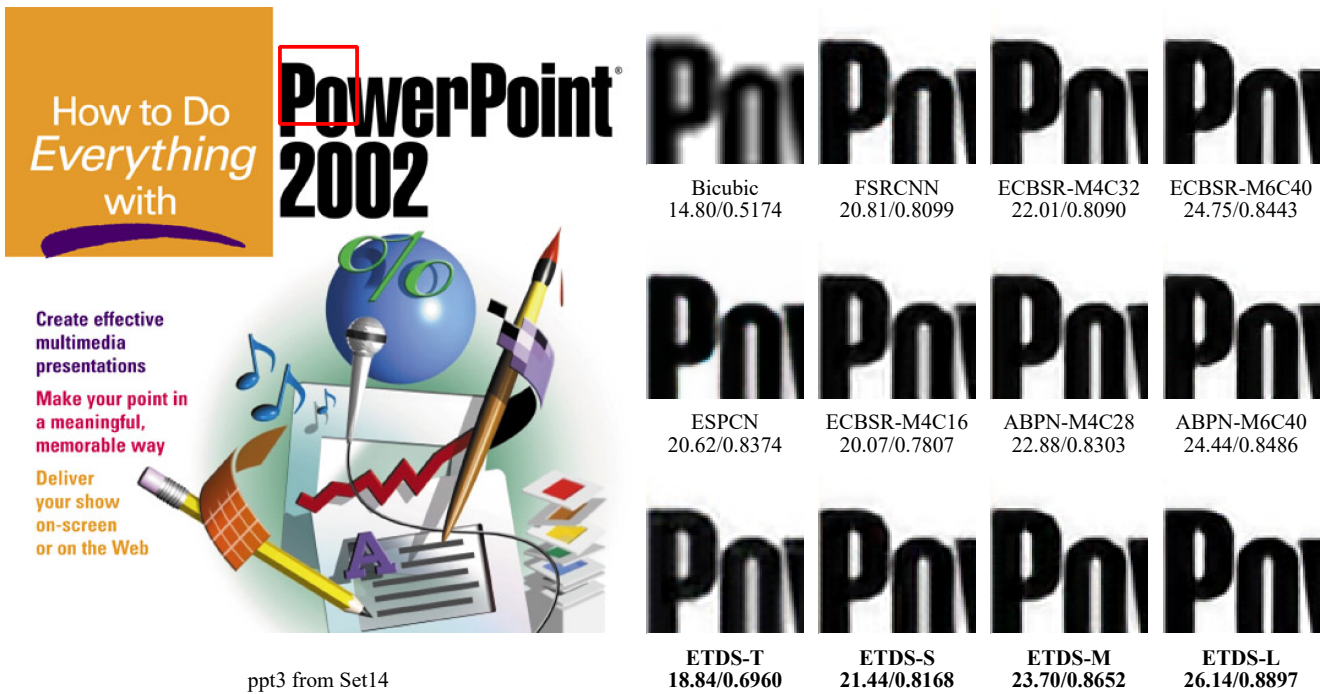

Figure 4. In the images generated by ETDS-L, the edges of the letters are sharper and the area between letter P and letter O has fewer artifacts. Zooming for details.

### C. Supplementary Comparison of Ablation Experiments for Equivalent Transformation

Table 1. Statistics of model parameters, MACs, and latency of ECBSR and ABPN with and without ET on  $\times 2$ ,  $\times 3$  and  $\times 4$  tasks. Better results are marked in **bold**.

| Scale      | Model          | Params (K) | MACs (G) | Latency (ms) |               |                 |
|------------|----------------|------------|----------|--------------|---------------|-----------------|
|            |                |            |          | CPU          | Android NNAPI | MediaTek Neuron |
| $\times 2$ | ECBSR-M4C16    | 11.55      | 2.64     | 208          | 6.15          | 4.57            |
|            | ECBSR+ET-M4C16 | 17.47      | 4.00     | <b>197</b>   | <b>5.51</b>   | <b>3.31</b>     |
|            | ECBSR-M4C32    | 41.52      | 9.53     | <b>344</b>   | 9.70          | 6.64            |
|            | ECBSR+ET-M4C32 | 52.04      | 11.94    | 354          | <b>8.67</b>   | <b>5.54</b>     |
|            | ECBSR-M6C40    | 92.37      | 21.22    | 617          | 18.1          | 10.9            |
|            | ECBSR+ET-M6C40 | 111.27     | 25.56    | <b>597</b>   | <b>17</b>     | <b>9.96</b>     |
|            | ABPN-M4C28     | 33.46      | 7.67     | 185          | 10.0          | 6.66            |
|            | ABPN+ET-M4C28  | 44.41      | 10.19    | <b>182</b>   | <b>8.6</b>    | <b>5.27</b>     |
| $\times 3$ | ABPN-M6C40     | 93.40      | 21.45    | 356          | 18.7          | 11.2            |
|            | ABPN+ET-M6C40  | 114.29     | 26.25    | <b>339</b>   | <b>17.2</b>   | <b>9.89</b>     |
|            | ECBSR-M4C16    | 13.72      | 3.14     | 225          | 16.2          | 11.0            |
|            | ECBSR+ET-M4C16 | 21.02      | 4.81     | <b>215</b>   | <b>9.35</b>   | <b>6.14</b>     |
|            | ECBSR-M4C32    | 45.85      | 10.52    | 356          | 19.7          | 13.1            |
|            | ECBSR+ET-M4C32 | 57.90      | 13.29    | <b>354</b>   | <b>13.1</b>   | <b>8.34</b>     |
|            | ECBSR-M6C40    | 97.79      | 22.46    | 652          | 28.1          | 17.4            |
|            | ECBSR+ET-M6C40 | 118.28     | 27.17    | <b>621</b>   | <b>21.5</b>   | <b>12.9</b>     |
| $\times 4$ | ABPN-M4C28     | 42.54      | 9.76     | 233          | 20.5          | 13.8            |
|            | ABPN+ET-M4C28  | 54.96      | 12.61    | <b>188</b>   | <b>13.7</b>   | <b>8.57</b>     |
|            | ABPN-M6C40     | 104.10     | 23.91    | 378          | 29.2          | 18.2            |
|            | ABPN+ET-M6C40  | 126.35     | 29.02    | <b>373</b>   | <b>22.4</b>   | <b>13.5</b>     |
|            | ECBSR-M4C16    | 16.77      | 3.83     | 277          | 23.9          | 13.7            |
|            | ECBSR+ET-M4C16 | 26.18      | 5.99     | <b>202</b>   | <b>11.7</b>   | <b>7.79</b>     |
|            | ECBSR-M4C32    | 51.92      | 11.91    | 381          | 28.0          | 16.3            |
|            | ECBSR+ET-M4C32 | 65.94      | 15.13    | <b>360</b>   | <b>15.7</b>   | <b>10.3</b>     |
| $\times 4$ | ECBSR-M6C40    | 105.37     | 24.20    | 663          | 36.8          | 20.7            |
|            | ECBSR+ET-M6C40 | 127.76     | 29.34    | <b>627</b>   | <b>23.5</b>   | <b>14.5</b>     |
|            | ABPN-M4C28     | 62.05      | 14.24    | 288          | 30.3          | 17.4            |
|            | ABPN+ET-M4C28  | 77.78      | 17.85    | <b>263</b>   | <b>17.8</b>   | <b>11.4</b>     |
|            | ABPN-M6C40     | 125.87     | 28.91    | 429          | 39.1          | 22.4            |
|            | ABPN+ET-M6C40  | 151.55     | 34.81    | <b>392</b>   | <b>26.6</b>   | <b>16.1</b>     |

Table 2. Statistics of model parameters, MACs, and inference latency of our ETDS with and without ET on  $\times 2$ ,  $\times 3$  and  $\times 4$  tasks. Inference latency is tested on Dimensity 8100C SoC. Better results are marked in **bold**.

| Scale      | Model           | Params (K) | MACs (G) | Latency (ms) |             |               |             |                 |             |
|------------|-----------------|------------|----------|--------------|-------------|---------------|-------------|-----------------|-------------|
|            |                 |            |          | CPU          |             | Android NNAPI |             | MediaTek Neuron |             |
|            |                 |            |          | INT8         | FP32        | INT8          | FP32        | INT8            | FP32        |
| $\times 2$ | ETDS-T (w/o ET) | 12.11      | 2.75     | 268          | 460         | 10.2          | 176         | 6.87            | 174         |
|            | ETDS-T          | 13.94      | 3.19     | <b>106</b>   | <b>187</b>  | <b>4.85</b>   | <b>40.1</b> | <b>3.81</b>     | <b>38.1</b> |
|            | ETDS-S (w/o ET) | 38.35      | 8.77     | 329          | 601         | 13.7          | 247         | 9.35            | 245         |
|            | ETDS-S          | 41.51      | 9.52     | <b>112</b>   | <b>391</b>  | <b>8.06</b>   | <b>62.2</b> | <b>5.77</b>     | <b>61.0</b> |
|            | ETDS-M (w/o ET) | 55.34      | 12.65    | 438          | 816         | 16.9          | 342         | 12.2            | 340         |
|            | ETDS-M          | 60.01      | 13.77    | <b>161</b>   | <b>511</b>  | <b>10.2</b>   | <b>83.6</b> | <b>6.73</b>     | <b>82.5</b> |
|            | ETDS-L (w/o ET) | 143.85     | 32.98    | 673          | 1394        | 30.3          | 599         | 18.4            | 596         |
|            | ETDS-L          | 152.18     | 34.97    | <b>342</b>   | <b>1003</b> | <b>20.6</b>   | <b>175</b>  | <b>12.1</b>     | <b>175</b>  |
| $\times 3$ | ETDS-T (w/o ET) | 14.30      | 3.25     | 298          | 482         | 19.6          | 210         | 14.2            | 203         |
|            | ETDS-T          | 16.92      | 3.86     | <b>97.9</b>  | <b>204</b>  | <b>8.64</b>   | <b>63.8</b> | <b>5.36</b>     | <b>57.4</b> |
|            | ETDS-S (w/o ET) | 42.70      | 9.76     | 351          | 626         | 22.8          | 290         | 16.6            | 284         |
|            | ETDS-S          | 46.79      | 10.73    | <b>114</b>   | <b>390</b>  | <b>12.2</b>   | <b>86.8</b> | <b>7.73</b>     | <b>81.3</b> |
|            | ETDS-M (w/o ET) | 59.69      | 13.65    | 462          | 841         | 26.3          | 385         | 19.3            | 379         |
|            | ETDS-M          | 65.29      | 14.98    | <b>164</b>   | <b>514</b>  | <b>14.4</b>   | <b>86.5</b> | <b>8.76</b>     | <b>83</b>   |
|            | ETDS-L (w/o ET) | 150.36     | 34.47    | 711          | 1441        | 39.6          | 642         | 25.9            | 635         |
|            | ETDS-L          | 159.77     | 36.71    | <b>377</b>   | <b>989</b>  | <b>25.4</b>   | <b>202</b>  | <b>14.2</b>     | <b>195</b>  |
| $\times 4$ | ETDS-T (w/o ET) | 17.37      | 3.94     | 333          | 508         | 19.2          | 253         | 12.4            | 243         |
|            | ETDS-T          | 21.36      | 4.88     | <b>116</b>   | <b>235</b>  | <b>10.9</b>   | <b>67.5</b> | <b>6.94</b>     | <b>59.1</b> |
|            | ETDS-S (w/o ET) | 48.79      | 11.16    | 372          | 665         | 22.8          | 324         | 16.0            | 314         |
|            | ETDS-S          | 54.11      | 12.41    | <b>125</b>   | <b>413</b>  | <b>14.6</b>   | <b>90.7</b> | <b>9.02</b>     | <b>83.2</b> |
|            | ETDS-M (w/o ET) | 65.78      | 15.04    | 490          | 882         | 26.7          | 419         | 17.9            | 408         |
|            | ETDS-M          | 72.61      | 16.66    | <b>175</b>   | <b>558</b>  | <b>16.6</b>   | <b>112</b>  | <b>9.98</b>     | <b>104</b>  |
|            | ETDS-L (w/o ET) | 159.47     | 36.56    | 737          | 1487        | 39.9          | 677         | 24.0            | 667         |
|            | ETDS-L          | 169.97     | 39.05    | <b>373</b>   | <b>1069</b> | <b>27.6</b>   | <b>205</b>  | <b>15.3</b>     | <b>198</b>  |

Tab. 1 and Tab. 2 show that once ABPN, ECBSR and ETDS are equipped with ET, the inference latency decreases. Also, it is observed that the inference latency is lower when the scale factor is larger. The possible reason is that with the increase of scale factor, the amount of data transferred by the global residual connection increases, which enlarges the burden on the IO bandwidth and RAM. To this end, tasks of larger scale factors enjoy more benefits of ET.

## D. More details about channel mask experiments

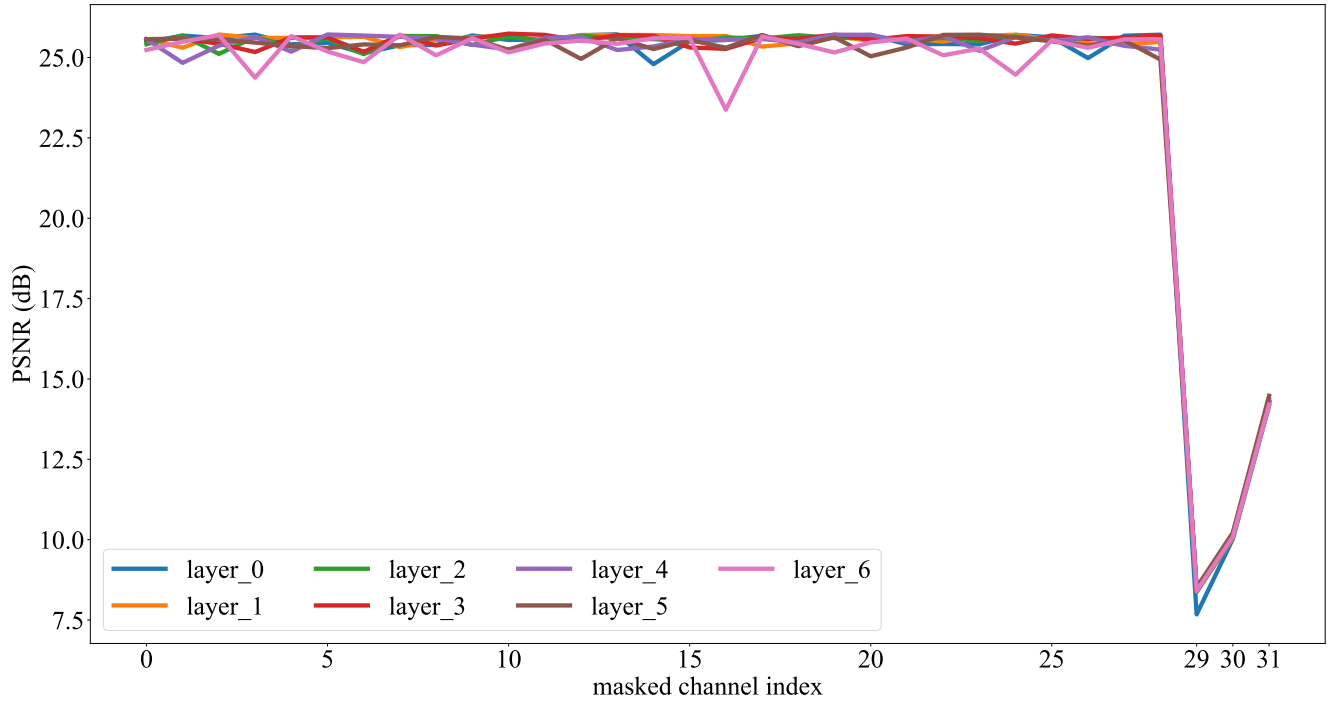

Figure 5. Channel masking experiments for all layers of ETDS.

The high-frequency component of an image is the one where the intensity values change quickly from one pixel to the adjacent ones. On the other hand, the low-frequency counterpart is relatively uniform in brightness or where intensity varies very slowly. Low-frequency components provide the basic information of an image, whose absence causes a significant decrease in image quality. Fig. 5 shows that there is a severe decrease when channels 29, 30 and 31 are masked, which means the low-frequency components are extracted by the last three channels (*i.e.*, residual branch) of each layer, which is consistent with our design goals.
